# Supplementary material for: Polypyrrole/cellulose nanofiber aerogel as a supercapacitor electrode material
Source: Royal Society of Chemistry journal article supplement (doi:10.1039/c6ra23216g), 2016-01-01
Supplement: c6ra23216g1.pdf [file c6ra23216g1.pdf]

Supporting Information For

**Polypyrrole/cellulose nanofibers aerogel as supercapacitors  
electrode material**

Qingyuan Niu<sup>1</sup>, Yaqing Guo<sup>1</sup>, Kezheng Gao<sup>1\*</sup>, Ziqiang Shao<sup>2\*</sup>

*1 School of Material and Chemical Engineering, Zhengzhou University of Light Industry,*

*Zhengzhou 450002, P. R. China*

*2 School of Materials science & Engineering, Beijing Institute of Technology, Beijing 100081, P. R.*

*China*

\* Corresponding author: E-mail: gaokezheng@126.com; shaoziqiang@263.net

**Characterization of cellulose nanofibers**

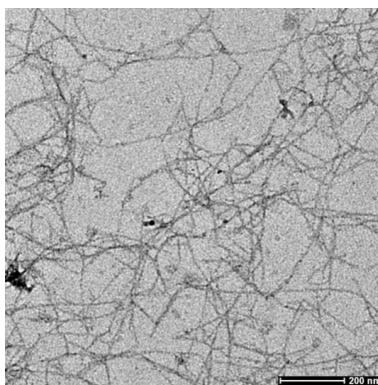

**Fig.S1** TEM image of cellulose nanofiber samples

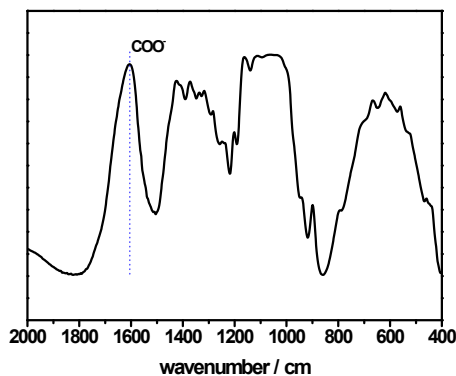

**Fig.S2** FT-IR spectra of cellulose nanofiber samples

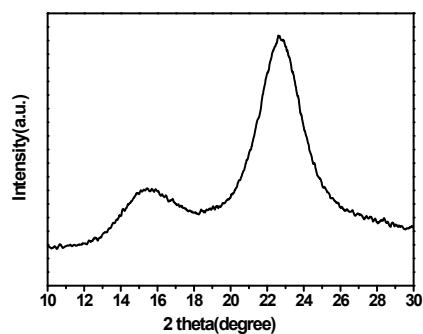

Fig.S3 XRD spectra of cellulose nanofiber samples

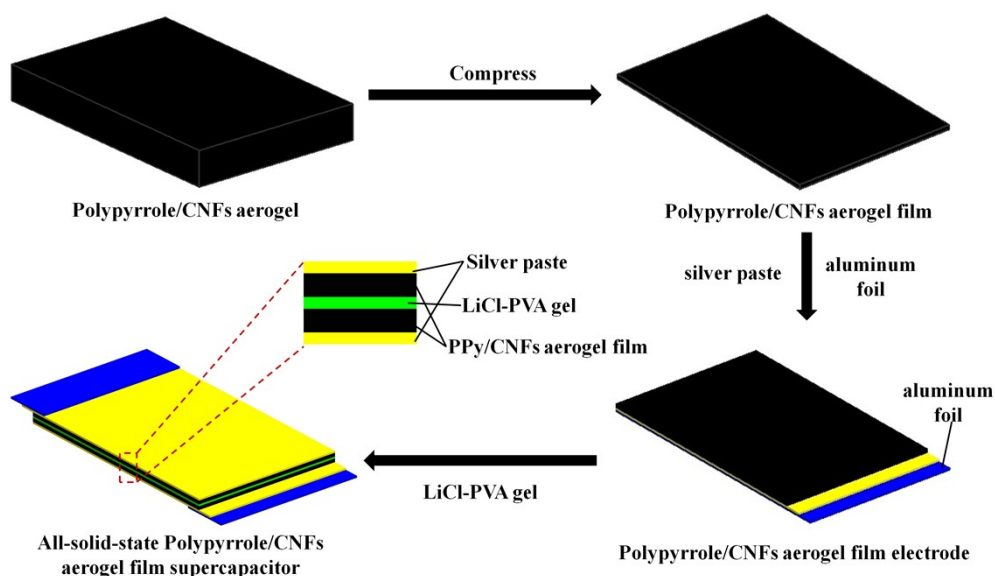

Fig.S4 Schematic diagram for the preparation of all solid-state supercapacitors.

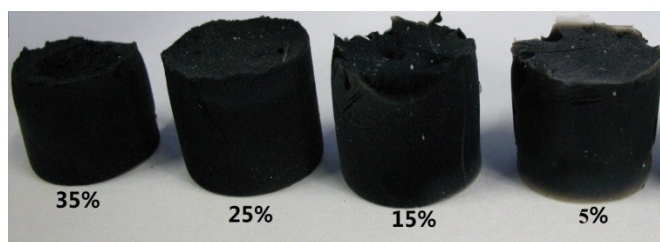

Fig.S5 Photograph of Polypyrrole/CNFs aerogel

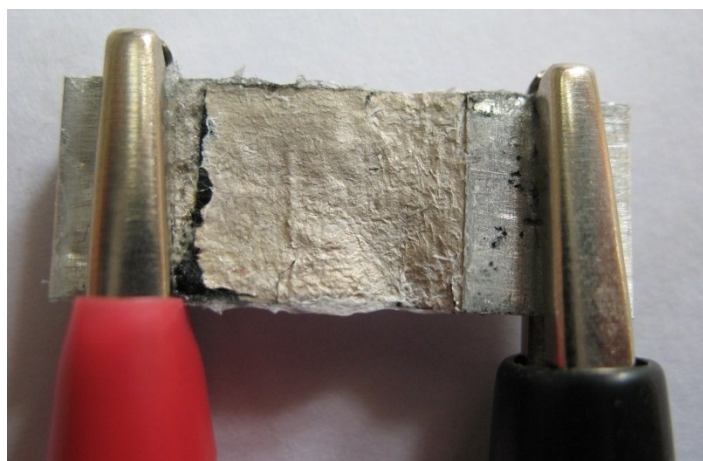

Fig.S6 Photograph of F-SC-25%

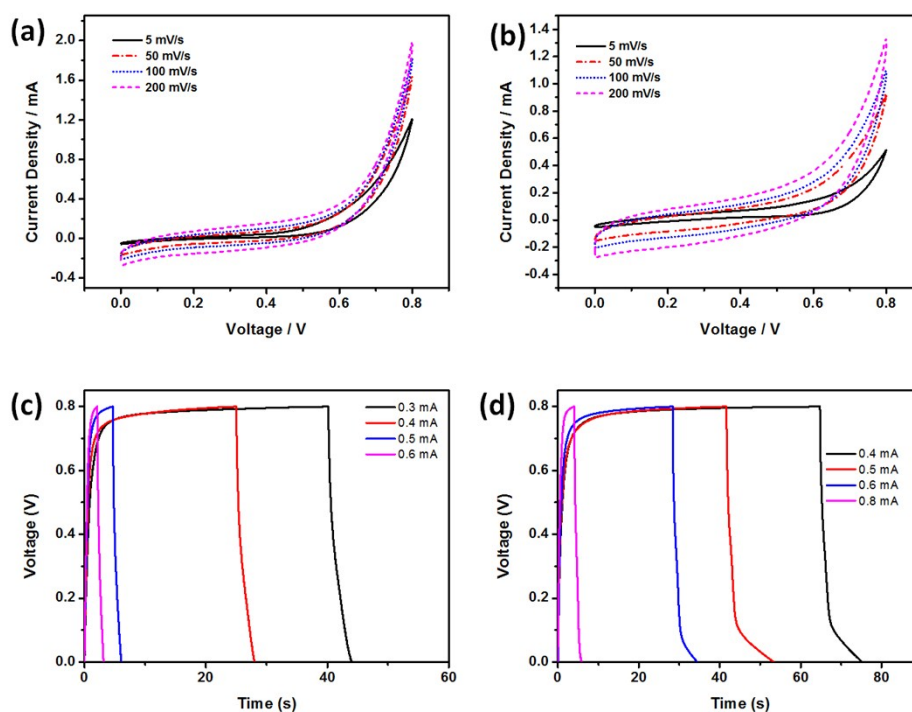

Fig. S7 CV curves of F-SC-5% (a), F-SC-15% (b) device at different scan rates. Galvanostatic charge-discharge curves of F-SC-5% (c), and F-SC-15%(c) at different current densities.

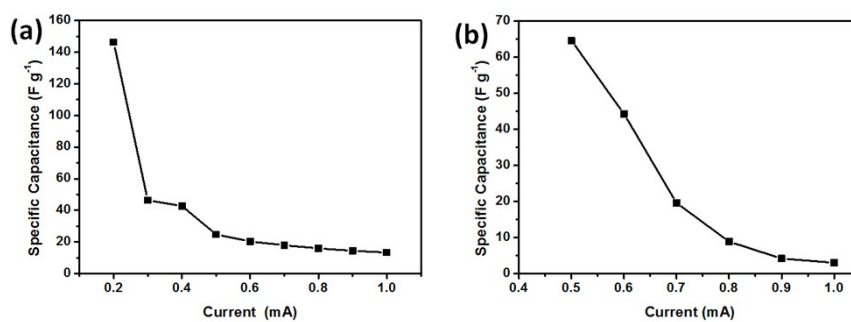

Fig. S8 The Specific capacitance of F-SC-5% (a), F-SC-15% (b) at different current.

The CV curves of F-SC-5% and F-SC-15% at different scan rates are shown in the Fig. S7a and S7b. It can be clearly seen that all the CV curves of F-SC-5%, and F-SC-15% exhibit a relatively large deformation. Furthermore, Galvanostatic charging and discharging curves of F-SC-5% and F-SC-15% at differently current densities are shown in the Fig. S7c and S7d. All charging and discharging curves show a severely deformed triangle, indicating not well capacitive behavior of F-SC-5% and F-SC-15%. This may be because the poor electrical conductivity of PPy/CNFs aerogel film (5%, and 15%) due to the lower PPy content. The maximum specific capacitance of F-SC-5%, and F-SC-5%, which can be measured by us, are about  $146 \text{ F g}^{-1}$  (0.2 mA), and  $65 \text{ F g}^{-1}$  (0.5 mA) (Fig. S8), respectively. So, The electrochemical performance of F-SC-5% and F-SC-15% is obviously inferior to that of F-SC-25% and F-SC-35%. Therefore, The next research will focus on the electrochemical properties of F-SC-25% and F-SC-35%.

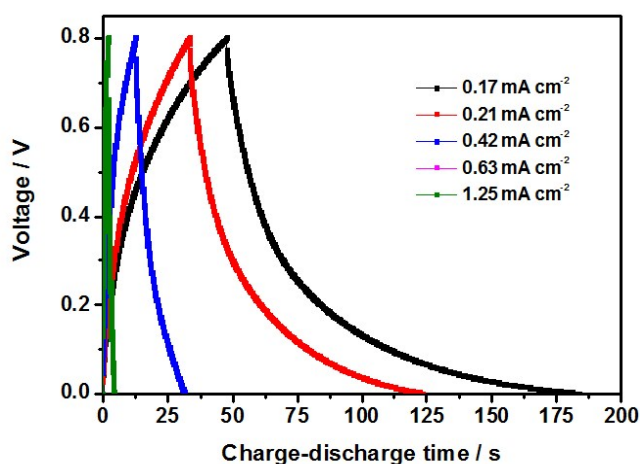

Fig.S9 Typical galvanostatic charge-discharge curves of F-SC-25% at different current densities.

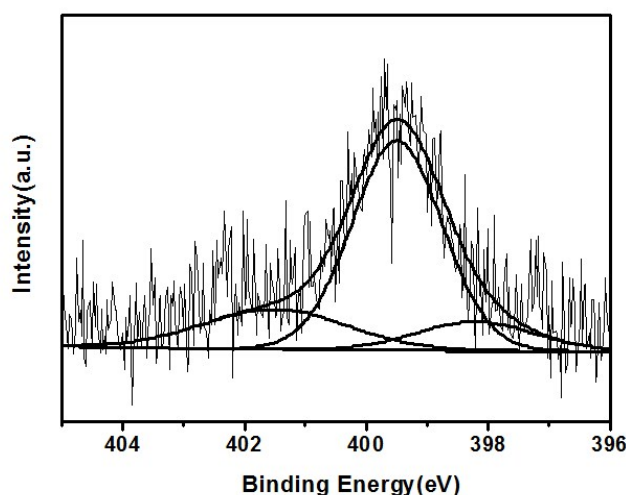

**Fig.S10** N 1s XPS spectrum of PPy/CNFs (35%) aerogel

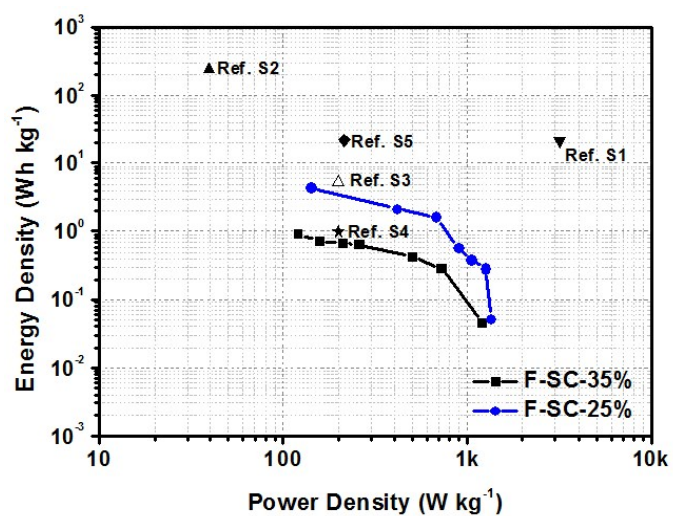

**Fig.S11** Ragone plots of the F-SC-25%, and the F-SC-35% in comparison with some reported supercapacitors.

#### References

- S1. F. Wang, H. J. Kim, S. Park, C. D. Kee, S. J. Kim and I. K. Oh, *Composites Science and Technology*, 2016, **128**, 33-40.
- S2. S. Peng, L. Fan, C. Wei, H. Bao, H. Zhang, W. Xu and J. Xu, *Cellulose*, 2016, **23**, 2639-2651.
- S3. Z. Hu, S. Li, P. Cheng, W. Yu, R. Li, X. Shao, W. Lin and D. Yuan, *Journal of Materials Science*, 2016, **51**, 2627-2633.
- S4. M. Wu, P. Li, Y. Li, J. Liu and Y. Wang, *Rsc Advances*, 2015, **5**, 16575-16581.
- S5. L. L. Jiang, L. Z. Sheng, X. Chen, T. Wei and Z. J. Fan, *Journal of Materials Chemistry A*, 2016, **4**, 11388-11396.
